# Supplementary material for: Highly versatile and accurate machine learning methods for predicting perovskite properties
Source: Royal Society of Chemistry journal article supplement (doi:10.1039/d4tc02268h), 2024-01-01
Supplement: d4tc02268h1.pdf [file d4tc02268h1.pdf]

## Highly versatile and accurate machine learning methods for predicting perovskite properties

Ziming Chen <sup>a</sup>, Jing Wang <sup>b\*</sup>, Canjie Li <sup>a</sup>, Baiquan Liu <sup>c</sup>, Dongxiang Luo <sup>d\*</sup>, Yonggang Min <sup>b</sup>, Nianqing Fu <sup>a\*</sup>, Qifan Xue <sup>a\*</sup>

<sup>a</sup> State Key Laboratory of Luminescent Materials and Devices, Institute of Polymer Optoelectronic Materials and Devices, School of Materials Science and Engineering, South China University of Technology, Guangzhou 510640, P. R. China

<sup>b</sup> School of Materials and Energy, Guangdong University of Technology, Guangzhou 510006, China

<sup>c</sup> School of Electronics and Information Technology, Sun Yat-sen University, Guangzhou, 510275, China

<sup>d</sup> Huangpu Hydrogen Innovation Center/Guangzhou Key Laboratory for Clean Energy and Materials, School of Chemistry and Chemical Engineering, Guangzhou University, Guangzhou, 510006, China

\*Corresponding author.

Email: [jingwang777@gdut.edu.cn](mailto:jingwang777@gdut.edu.cn) (J. Wang); [luodx@gzhu.edu.cn](mailto:luodx@gzhu.edu.cn) (D. Luo); [msnqfu@scut.edu.cn](mailto:msnqfu@scut.edu.cn) (N. Fu); [qfxue@scut.edu.cn](mailto:qfxue@scut.edu.cn) (Q. Xue).

Tabel S1. feature explanation

| Feature name                  | explain                                                                                                           |
|-------------------------------|-------------------------------------------------------------------------------------------------------------------|
| MagpieData avg_dev Column     | Mean absolute deviation of material properties                                                                    |
| Transition metal fraction     | transition metal atomic fraction                                                                                  |
| MagpieData maximum NdUnfilled | The number of unfilled d orbital electrons of the element with the largest number of unfilled f orbital electrons |
| MagpieData mean NfUnfilled    | Average number of electrons in unfilled f orbitals                                                                |
| MagpieData mean NpValence     | Average number of valence electrons                                                                               |
| MagpieData maximum Number     | maximum atomic number                                                                                             |
| Minimum EN difference         | The smallest electronegativity difference between elements in a compound                                          |
| Volume                        | unit cell volume                                                                                                  |
| MagpieData avg_dev NUnfilled  | The average number of unfilled d and f electrons of the elements in the material                                  |

More feature details can be found on the official website of matminer.

[https://hackingmaterials.lbl.gov/matminer/featurizer\\_summary.html](https://hackingmaterials.lbl.gov/matminer/featurizer_summary.html)

**Table S2.** Formation energy model training results for single and double perovskites.

| □     | ABX <sub>3</sub> |        | A <sub>2</sub> B(I)B(II)X <sub>6</sub> |        |
|-------|------------------|--------|----------------------------------------|--------|
|       | R2               | RMSE   | R2                                     | RMSE   |
| Ridge | 0.8838           | 0.3259 | 0.9452                                 | 0.1837 |
| DT    | 0.8730           | 0.2947 | 0.9410                                 | 0.1837 |
| RFR   | 0.9043           | 0.2968 | 0.9437                                 | 0.1851 |
| XGB   | 0.9336           | 0.2546 | 0.9717                                 | 0.1317 |
| SVM   | 0.9147           | 0.2784 | 0.9499                                 | 0.1746 |
| MLPR  | 0.9149           | 0.2788 | 0.9471                                 | 0.1793 |

**Table S3.** Merge Data Formation energy Training Results.

| □     | Startegy1 |        | Startegy 2 |        |
|-------|-----------|--------|------------|--------|
|       | R2        | RMSE   | R2         | RMSE   |
| Ridge | 0.9172    | 0.2592 | 0.9174     | 0.2591 |
| DT    | 0.9012    | 0.2508 | 0.9021     | 0.2490 |
| RFR   | 0.9241    | 0.2466 | 0.9243     | 0.2460 |
| XGB   | 0.9438    | 0.2073 | 0.9435     | 0.2118 |
| SVM   | 0.9294    | 0.2373 | 0.9270     | 0.2420 |
| MLPR  | 0.9319    | 0.2311 | 0.9311     | 0.2324 |

**Table S4.** Bandgap model training results for single and double perovskites.

| □     | ABX <sub>3</sub> |        | A <sub>2</sub> B(I)B(II)X <sub>6</sub> |        |
|-------|------------------|--------|----------------------------------------|--------|
|       | R2               | RMSE   | R2                                     | RMSE   |
| Ridge | 0.6070           | 1.0393 | 0.6110                                 | 0.9930 |
| DT    | 0.7075           | 0.8184 | 0.7824                                 | 0.6280 |
| RFR   | 0.7640           | 0.8153 | 0.8422                                 | 0.6315 |
| XGB   | 0.7995           | 0.7419 | 0.8688                                 | 0.5742 |
| SVM   | 0.7321           | 0.8617 | 0.8349                                 | 0.6900 |
| MLPR  | 0.7626           | 0.8121 | 0.8588                                 | 0.6219 |

**Table S5.** Merge Data Bandgap Training Results.

| □     | Startegy 1 |        | Startegy 2 |        |
|-------|------------|--------|------------|--------|
|       | R2         | RMSE   | R2         | RMSE   |
| Ridge | 0.5519     | 1.0953 | 0.5589     | 1.0867 |
| DT    | 0.7229     | 0.7459 | 0.7398     | 0.7348 |
| RFR   | 0.7960     | 0.7433 | 0.7890     | 0.7397 |
| XGB   | 0.8310     | 0.6817 | 0.8311     | 0.6820 |
| SVM   | 0.7431     | 0.7962 | 0.7724     | 0.7851 |

|      |        |        |        |        |
|------|--------|--------|--------|--------|
| MLPR | 0.7995 | 0.7368 | 0.7987 | 0.7376 |
|------|--------|--------|--------|--------|

**Table S6.** Bandgap model training results after merged data processed by feature engineering.

| □    | Startegy 1 |        | Startegy 2 |        |
|------|------------|--------|------------|--------|
|      | R2         | RMSE   | R2         | RMSE   |
| RFR  | 0.8250     | 0.6884 | 0.8242     | 0.6900 |
| XGB  | 0.8407     | 0.6571 | 0.8384     | 0.6604 |
| MLPR | 0.8000     | 0.7382 | 0.8110     | 0.7431 |

**Table S7.** Formation energy model training results after merged data processed by feature engineering

| □    | Startegy 1 |        | Startegy 2 |        |
|------|------------|--------|------------|--------|
|      | R2         | RMSE   | R2         | RMSE   |
| RFR  | 0.9287     | 0.2388 | 0.9292     | 0.2382 |
| XGB  | 0.9480     | 0.2052 | 0.9473     | 0.2060 |
| MLPR | 0.9362     | 0.2342 | 0.9363     | 0.2265 |

**Table S8.** Standard deviation of the result after 100 training sessions of the bandgap model

| □    | Startegy 1 |        | Startegy 2 |        |
|------|------------|--------|------------|--------|
|      | R2         | RMSE   | R2         | RMSE   |
| RFR  | 0.0502     | 0.1079 | 0.0500     | 0.1081 |
| XGB  | 0.0567     | 0.1284 | 0.0518     | 0.1166 |
| MLPR | 0.0633     | 0.1279 | 0.0552     | 0.1152 |

**Table S9.** Standard deviation of the result after 100 training sessions of the Formation energy model

| □    | Startegy 1 |        | Startegy 2 |        |
|------|------------|--------|------------|--------|
|      | R2         | RMSE   | R2         | RMSE   |
| RFR  | 0.0378     | 0.0778 | 0.0376     | 0.0775 |
| XGB  | 0.0276     | 0.0652 | 0.0252     | 0.0622 |
| MLPR | 0.0286     | 0.0622 | 0.0279     | 0.0623 |

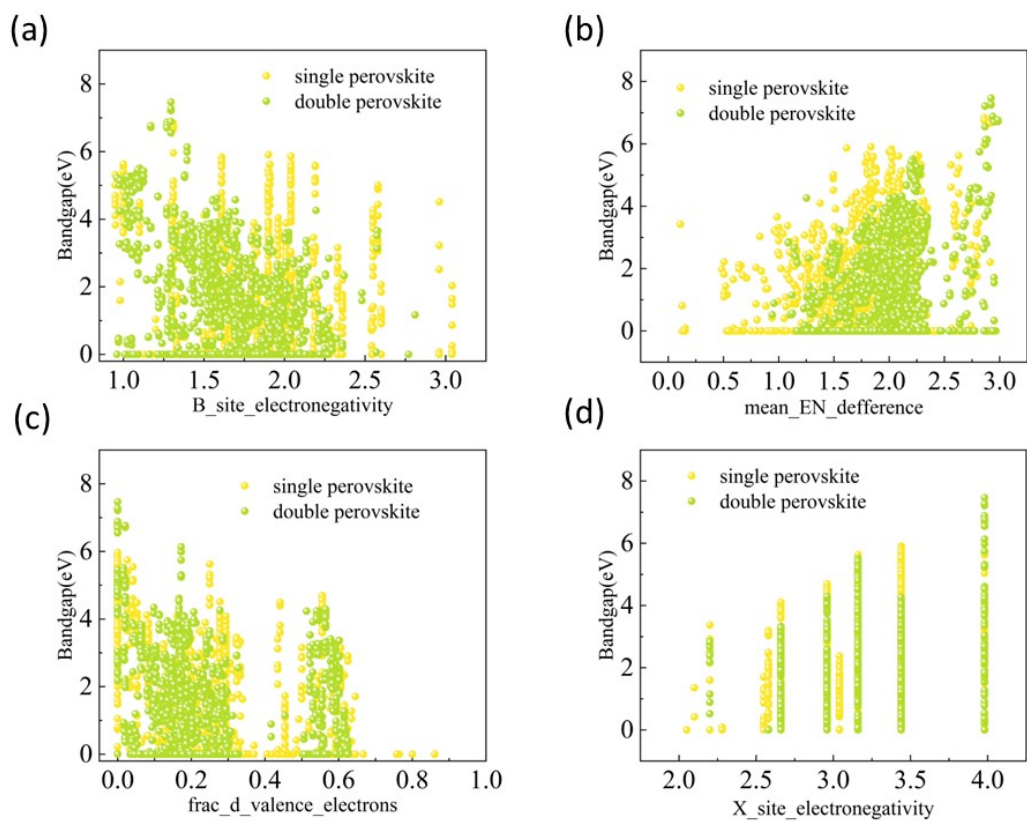

**Figure S1.** B\_site\_electronegativity, mean EN difference, frac d valence electrons, X\_site\_electronegativity and bandgap distribution relationship

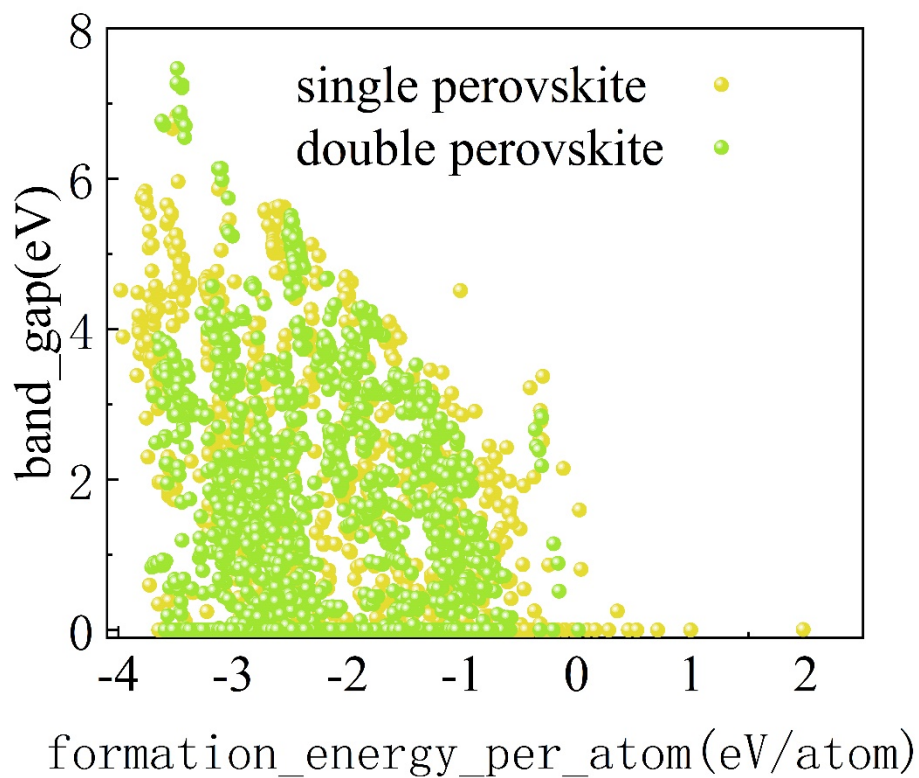

**Figure S2.** Formation energy and bandgap distribution relationship

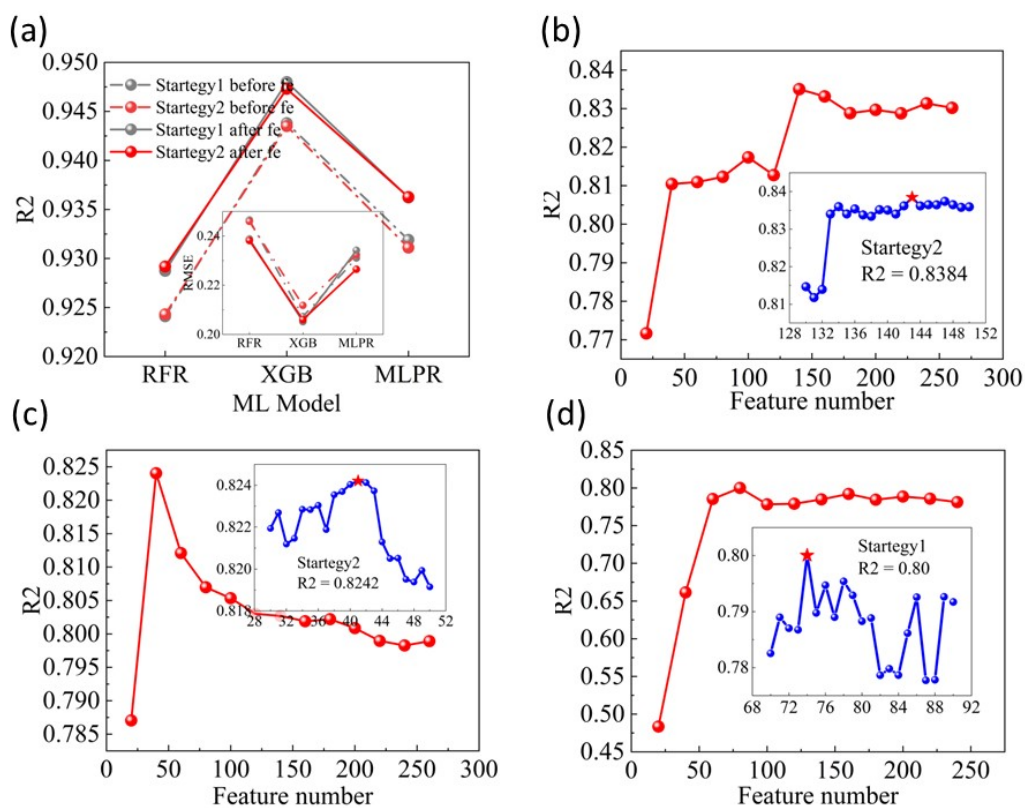

**Figure S3.** Feature engineering of Formation energy Model; (a) RFR, XGBoost and MLPR three models after feature engineering processing model effect; (b) XGBoost model training R2 changes with the number of features; (c) MLPR model training R2 changes with the number of features (d) R2 of RFR model training changes with the number of features;

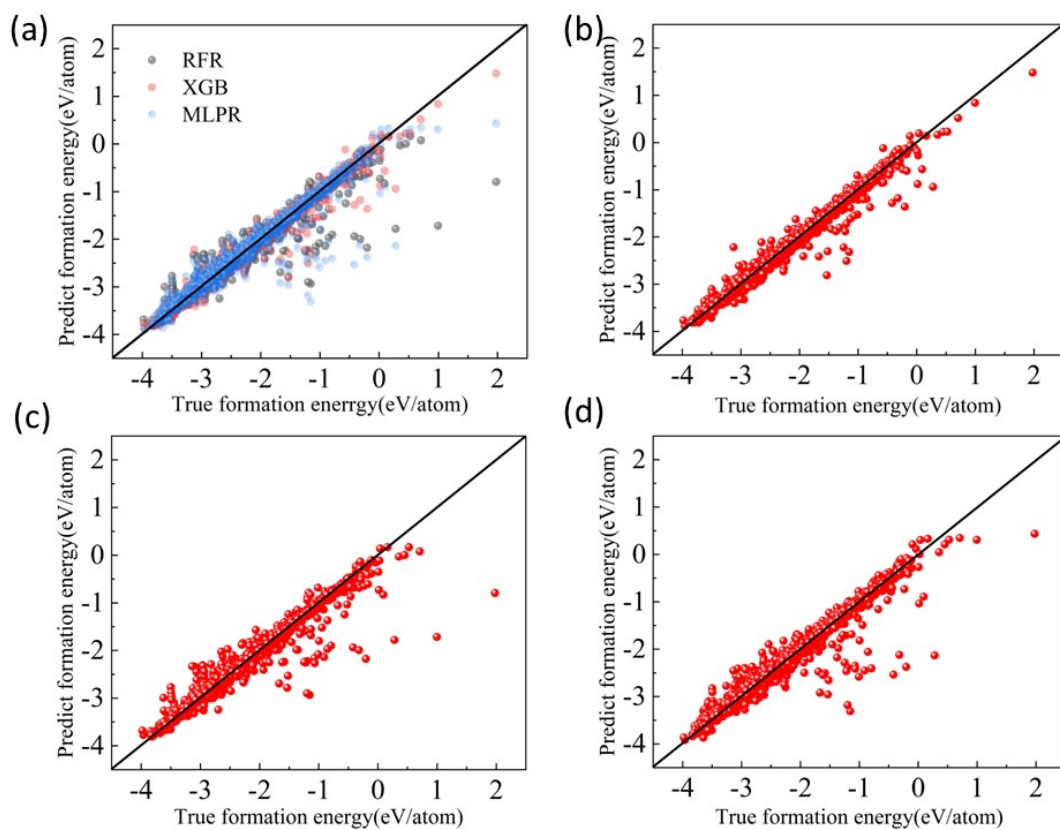

**Figure S4.** Fitting trend chart of the formation energy model ; (a) Fitting trend chart of XGB&RFR&MLPR;(b) Fitting trend chart of XGB;(c) Fitting trend chart of RFR;(d) Fitting trend chart of MLPR;

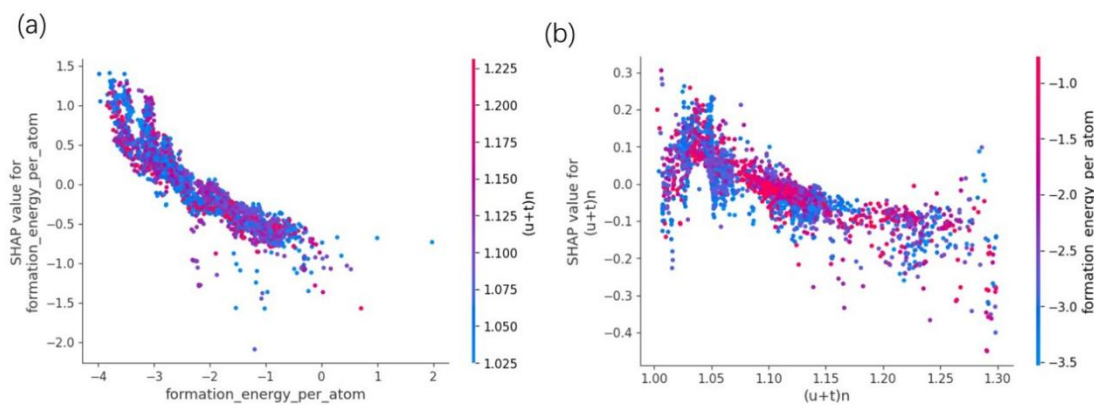

**Figure S5.** shap dependency graph of formation energy/ $(\mu+t)^n$  ;

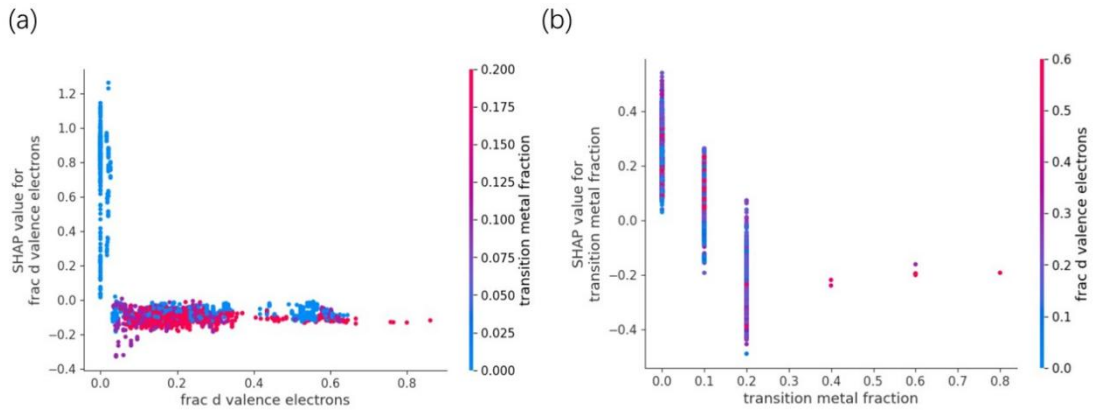

**Figure S6.** shap dependency graph of frac d valence electrons/transition metal fraction;

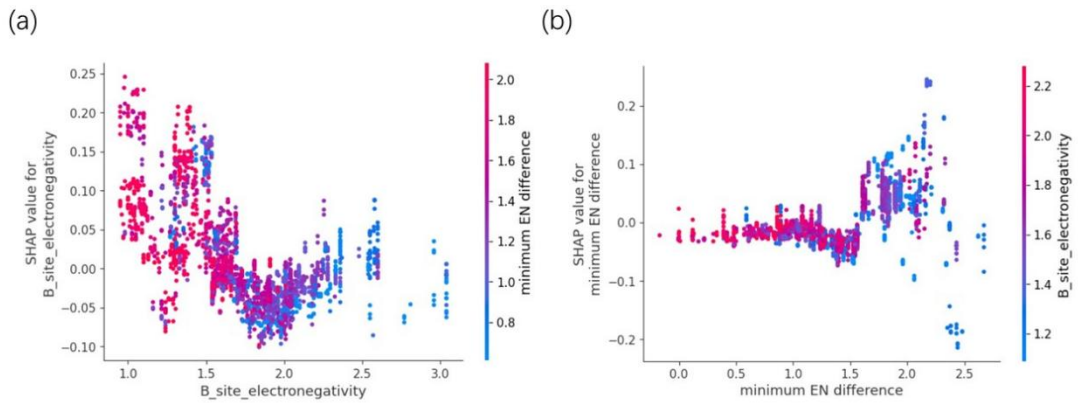

**Figure S7.** shap dependency graph of B site electronegativity/minimum EN difference;

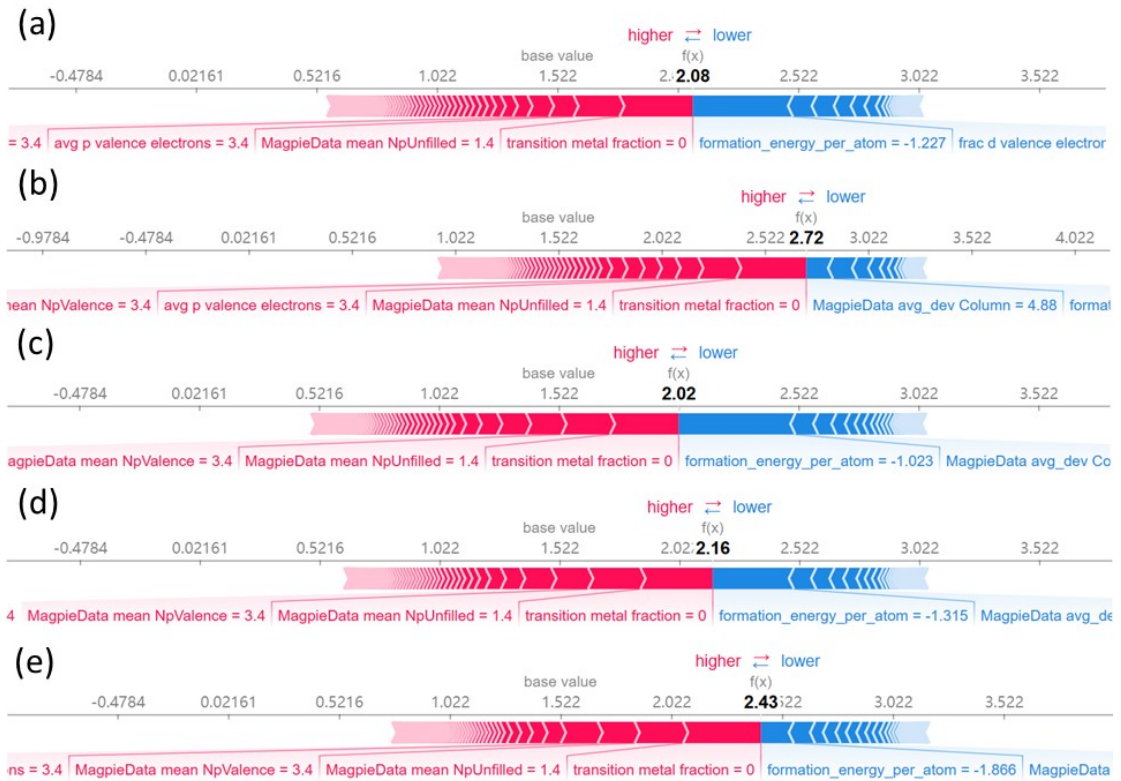



**Figure S8.** SHAP value of a single sample, where (a) is CsSnBr<sub>3</sub>; (b) is CsSnCl<sub>3</sub>; (c) is CsPbI<sub>3</sub>; (d) is CsPbBr<sub>3</sub>; (e) is CsPbCl<sub>3</sub>;

## Model hyperparameters

### Bandgap Model

# Ridge

```
ABX3: {'alpha': 10, 'solver': 'saga'}  
A2B(I)B(II)X6: {'alpha': 0.1, 'solver': 'lsqr'}  
Startegy 1: {'alpha': 10, 'solver': 'lsqr'}  
Startegy 2: {'alpha': 10, 'solver': 'lsqr'}
```

# DT

```
ABX3: {'max_depth':72,  
'max_features':183,'max_leaf_nodes':172,'min_samples_leaf':5,'min_samples_split':4}  
A2B(I)B(II)X6: {'max_depth':24,'max_features':70,'max_leaf_nodes':293,'min_samples_leaf':3,  
'min_samples_split':3}  
Startegy1: {'max_depth':40,'max_features':270,'max_leaf_nodes':108,'min_samples_leaf':4,'mi  
n_samples_split':2}  
Startegy2: {'max_depth':60,'max_features':199,'max_leaf_nodes':144,'min_samples_leaf':4,'mi  
n_samples_split':2}
```

#RFR

```
ABX3: {'max_depth':95,'max_features': 'sqrt', 'min_samples_leaf':1, 'min_samples_split':3, 'n_esi  
mators':855}  
A2B(I)B(II)X6: {'max_depth':95,'max_features': 'sqrt',  
'min_samples_leaf':1, 'min_samples_split':3, 'n_estimators':855}  
Startegy1: {'max_depth':17,'max_features': 'sqrt', 'min_sample_leaf':1, 'min_samples_split':3, 'n_e  
stimators':944}  
Startegy2: {'max_depth':72,'max_features': 'sqrt', 'min_sample_leaf':1, 'min_samples_split':5, 'n_e  
stimators':1756}
```

#SVR

```
ABX3: {'kernel': 'rbf', 'C':70, 'gamma':0.0006, 'epsilon':0.3}  
A2B(I)B(II)X6: {'kernel': 'rbf', 'C':129, 'gamma':0.006631, 'epsilon':0.1935}  
Startegy 1: {'kernel': 'rbf', 'C':32, 'gamma':0.004135, 'epsilon':0.128}  
Startegy 2: {'kernel': 'rbf', 'C':22, 'gamma':0.003007, 'epsilon':0.2721}
```



#XGBoost

ABX<sub>3</sub>: {'n\_estimators':437,'eta'=0.0444,'reg\_alpha':4.182,'reg\_lambda':0.8283,'gamma':0,'max\_depth':8,'colsample\_bytree':0.694,'colsample\_bylevel':0.6674,'colsample\_bynode':0.7819,'min\_child\_weight':3.771}

A<sub>2</sub>B(I)B(II)X<sub>6</sub>: {'n\_estimators':211,'eta'=0.06295,'reg\_alpha':2.845,'reg\_lambda':0.02552,'gamma':0,'max\_depth':9,'colsample\_bytree':0.8108,'colsample\_bylevel':0.7524,'colsample\_bynode':0.5698,'min\_child\_weight':9.998}

Startegy1: {'n\_estimators':382,'eta'=0.0263,'reg\_alpha':0,'reg\_lambda':0,'gamma':0,'max\_depth':10,'colsample\_bytree':1,'colsample\_bylevel':0.5,'colsample\_bynode':1,'min\_child\_weight':9.998}

Startegy2: {'n\_estimators':343,'eta'=0.03052,'reg\_alpha':0.5829,'reg\_lambda':1.032,'gamma':0,'max\_depth':9,'colsample\_bytree':0.5653,'colsample\_bylevel':0.5576,'colsample\_bynode':0.6966,'min\_child\_weight':9.416}

#MLPR

ABX<sub>3</sub>: {'activation':'logistic', 'alpha': 0.0630936388609197, 'hidden\_layer\_sizes': (136,34), 'learning\_rate\_init': 0.00010425699084203143, 'solver': 'adam', 'learning\_rate': 'constant'}

A<sub>2</sub>B(I)B(II)X<sub>6</sub>: {'activation':'logistic', 'alpha':0.1, 'hidden\_layer\_sizes':(200,40 , 10) , 'learning\_rate\_init': 0.00010425699084203143, 'solver': 'adam', 'learning\_rate': 'constant'}

Startegy1: {'activation': 'logistic', 'alpha': 0.1, 'hidden\_layer\_sizes\_1': (78,57,69), 'learning\_rate\_init': 0.01, 'solver': 'adam' , 'learning\_rate': 'constant'}

Startegy2: {'activation': 'logistic', 'alpha': 0.1, 'hidden\_layer\_sizes\_1': (195,178,69), 'learning\_rate\_init': 0.01, 'solver': 'adam', 'learning\_rate': 'constant'}

## Formation energy Model

#DT

ABX<sub>3</sub>: {'max\_depth':18, 'max\_features':70,'max\_leaf\_nodes':298,'min\_samples\_leaf':3,'min\_samples\_split':2}

A<sub>2</sub>B(I)B(II)X<sub>6</sub>: {'max\_depth':20,'max\_features':158,'max\_leaf\_nodes':168,'min\_samples\_leaf':6,'min\_samples\_split':3}

Startegy1: {'max\_depth':31,'max\_features':150,'max\_leaf\_nodes':165,'min\_samples\_leaf':7,'min\_samples\_split':3}

Startegy2: {'max\_depth':25,'max\_features':171,'max\_leaf\_nodes':169,'min\_samples\_leaf':6,'min\_samples\_split':2}

#SVR

ABX<sub>3</sub>: {'kernel': 'rbf', 'C':81, 'gamma':0.002175 , 'epsilon':0.08703}

A<sub>2</sub>B(I)B(II)X<sub>6</sub>: {'kernel': 'rbf', 'C':82, 'gamma':0.0001432 , 'epsilon':0.03054}

Startegy 1: {'kernel': 'rbf', 'C':32, 'gamma':0.001582 , 'epsilon':0.01925}

Startegy 2: {'kernel': 'rbf', 'C':140, 'gamma':0.0005126 , 'epsilon':0.01985}

#Ridge

ABX<sub>3</sub>: {'alpha': 10, 'solver': 'lsqr'}

A<sub>2</sub>B(I)B(II)X<sub>6</sub>: {'alpha': 10, 'solver': 'lsqr'}

Startegy 1: {'alpha': 1, 'solver': 'svd'}

Startegy 2: {'alpha': 1, 'solver': 'svd'}

#RFR

ABX<sub>3</sub>: {'max\_depth':20,'max\_features': 'sqrt', 'min\_samples\_leaf':1, 'min\_samples\_split':2, 'n\_estimators':896}

A<sub>2</sub>B(I)B(II)X<sub>6</sub>: {'max\_depth':44,'max\_features': 'sqrt', 'min\_samples\_leaf':3, 'min\_samples\_split':3, 'n\_estimators':872}

Startegy1: {'max\_depth':16,'max\_features': 'sqrt', 'min\_sample\_leaf':2, 'min\_samples\_split':2, 'n\_estimators':894}

Startegy2: {'max\_depth':19,'max\_features': 'sqrt', 'min\_sample\_leaf':2, 'min\_samples\_split':4, 'n\_estimators':905}

#XGBoost

ABX<sub>3</sub>: {'n\_estimators':482, 'eta'=0.09802, 'reg\_alpha':0.1728, 'reg\_lambda':0.8499, 'gamma':0, 'max\_depth':4, 'colsample\_bytree':0.8897, 'colsample\_bylevel':0.8691, 'colsample\_bynode':0.7906, 'min\_child\_weight':1.502}

A<sub>2</sub>B(I)B(II)X<sub>6</sub>: {'n\_estimators':478, 'eta'=0.1752, 'reg\_alpha':0.5263, 'reg\_lambda':0.2829, 'gamma':0, 'max\_depth':3, 'colsample\_bytree':0.9645, 'colsample\_bylevel':0.7488, 'colsample\_bynode':0.9907, 'min\_child\_weight':1.051}

Startegy1: {'n\_estimators':497, 'eta'=0.1557, 'reg\_alpha':1.176, 'reg\_lambda':0.487, 'gamma':0, 'max\_depth':3, 'colsample\_bytree':0.7591, 'colsample\_bylevel':0.5681, 'colsample\_bynode':0.7721, 'min\_child\_weight':2.762}

Startegy2: {'n\_estimators':499, 'eta'=0.1201, 'reg\_alpha':0.4421, 'reg\_lambda':1.218, 'gamma':0, 'max\_depth':4, 'colsample\_bytree':0.9786, 'colsample\_bylevel':0.6738, 'colsample\_bynode':0.672, 'min\_child\_weight':9.896}

#MLPR

ABX<sub>3</sub>: {'activation': 'logistic', 'alpha': 0.025631686291210192, 'hidden\_layer\_sizes': (110,63), 'learning\_rate\_init': 0.005226903632157869, 'solver': 'adam', 'learning\_rate': 'constant'}

A<sub>2</sub>B(I)B(II)X<sub>6</sub>: {'activation': 'logistic', 'alpha': 0.09967573041687423, 'hidden\_layer\_sizes': (79), , 'learning\_rate\_init': 0.0007669614243494098, 'solver': 'adam', 'learning\_rate': 'constant'}

Startegy1: {'activation': 'logistic', 'alpha':0.03467271741957278, 'hidden\_layer\_sizes': (198), 'learning\_rate\_init': 0.0031155210604508106, 'solver': 'adam', 'learning\_rate': 'constant'}

Startegy2: {'activation': 'logistic', 'alpha': 0.028072119868422, 'hidden\_layer\_sizes\_1': (152), 'learning\_rate\_init': 0.001691193658192399, 'solver': 'adam', 'learning\_rate': 'constant'}

**Feature Engineering ( features number )**

## **Band gap model**

#RFR:

Startegy 1:30 features

Startegy 2:41 features

#XGBoost:

Startegy 1:135 features

Startegy 2:143 features

#MLPR:

Startegy 1:74 features

Startegy 2:103 features

## **Formation energy model**

#RFR:

Startegy 1:52features

Startegy 2:43features

#XGBoost:

Startegy 1:218features

Startegy 2:111features

#MLPR:

Startegy 1:234features

Startegy 2:125features

Code and Data: [https://github.com/czmcut/ML\\_pv\\_k\\_bandgap\\_predict](https://github.com/czmcut/ML_pv_k_bandgap_predict)
